# Supplementary material
Source: MDPI journal article supplement (https://www.mdpi.com/2624-8549/4/4/80)
Supplement: s1 [file s1]

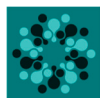*Supplementary Data*

# New Bi-Nuclear Nickel(II) Complex-Based Salen Schiff Base: Synthesis, Crystal Structure, Spectroscopic, Thermal, and Electrical Investigations

Bouchra Es-Sounni <sup>1</sup>, El Mehdi Haily <sup>2</sup>, Asmae Nakkabi <sup>3</sup>, Mohamed Bakhouch <sup>4,\*</sup>, Linda Bejaoui <sup>5</sup>, Savaş Kaya <sup>6</sup>, Mohamed El Yazidi <sup>3</sup>, Lahcen Bih <sup>7</sup>, Mohamed Saadi <sup>8</sup>, Lahcen El Ammari <sup>8</sup> and Mohammed Fahim <sup>1,\*</sup>

- <sup>1</sup> Laboratory of Innovative Materials and Biotechnology of Naturel Resources, Faculty of Sciences, Moulay Ismail University, P.O. Box 11201, Meknes 50000, Morocco
  - <sup>2</sup> Composites and Nanocomposites Center, Moroccan Foundation for Advanced Science, Innovation and Research (MAScIR), Rabat Design Center, Rabat 10100, Morocco;
  - <sup>3</sup> Engineering Laboratory of Organometallic and Molecular Materials and Environment, Faculty of Sciences Dhar EL Mahraz, University Sidi Mohamed Ben Abdellah, P.O. Box 1796, Fez 30000, Morocco
  - <sup>4</sup> Laboratory of Bioorganic Chemistry, Department of Chemistry, Faculty of Sciences, Chouaib Doukkali University, P.O. Box 24, El Jadida 24000, Morocco
  - <sup>5</sup> Unité de Recherche de Chimie des Matériaux et de l'Environnement (UR11ES25), ISSBAT, Université de Tunis El Manar, 9, Avenue Dr. Zoheir Safi, Tunis 1006, Tunisie
  - <sup>6</sup> Department of Pharmacy, Health Services Vocational School, Sivas Cumhuriyet University, 58140 Sivas, Turkey
  - <sup>7</sup> Laboratoire des Sciences et Métiers de L'Ingénieur (LSMI), Département Matériaux et Procédés, ENSAM Meknès, Université Moulay Ismail, Meknes 50500, Morocco
  - <sup>8</sup> Laboratoire de Chimie Appliquée des Matériaux, Centres des Sciences des Matériaux, Faculty of Science, Mohammed V University in Rabat, Avenue Ibn Battouta, BP. 1014, Rabat 10106, Morocco
- \* Correspondence: bakhouch.m@ucd.ac.ma (M.B.); mo.fahim@yahoo.fr (M.F.)

## Contents

Figure S1. FT-IR spectrum of the ligand H<sub>2</sub>L.

Figure S2. FT-IR spectrum of the [Ni<sub>2</sub>HL<sub>2</sub>(EtOH)<sub>2</sub>](Cl)(EtOH) complex.

Figure S3. Mass spectrum of the [Ni<sub>2</sub>HL<sub>2</sub>(EtOH)<sub>2</sub>](Cl)(EtOH) complex.

Figure S4. Temperature dependence of the permittivity ( $\epsilon_r$ ) and the dielectric loss  $\tan(\delta)$  of H<sub>2</sub>L and [Ni<sub>2</sub>HL<sub>2</sub>(EtOH)<sub>2</sub>](Cl)(EtOH) at 1KHz.

Figure S5. Cole-Cole diagrams of (a) H<sub>2</sub>L and (b) [Ni<sub>2</sub>HL<sub>2</sub>(EtOH)<sub>2</sub>](Cl)(EtOH) at different temperatures.

Figure S6.  $\ln(\sigma_{dc})$  versus  $10^3/T$  plots of H<sub>2</sub>L and [Ni<sub>2</sub>HL<sub>2</sub>(EtOH)<sub>2</sub>](Cl)(EtOH).

Figure S7. Temperature dependence of the exponent (s) of H<sub>2</sub>L and [Ni<sub>2</sub>HL<sub>2</sub>(EtOH)<sub>2</sub>](Cl)(EtOH).

Table S1: Fractional atomic coordinates and isotropic or equivalent isotropic displacement parameters ( $\text{\AA}^2$ ) of [Ni<sub>2</sub>HL<sub>2</sub>(EtOH)<sub>2</sub>](Cl)(EtOH) complex.

Table S2. Atomic displacement parameters ( $\text{\AA}^2$ ) for [Ni<sub>2</sub>HL<sub>2</sub>(EtOH)<sub>2</sub>](Cl)(EtOH) complex.

Table S3. Selected bond distances ( $\text{\AA}$ ) and angles ( $^\circ$ ) for the [Ni<sub>2</sub>HL<sub>2</sub>(EtOH)<sub>2</sub>](Cl)(EtOH) complex.

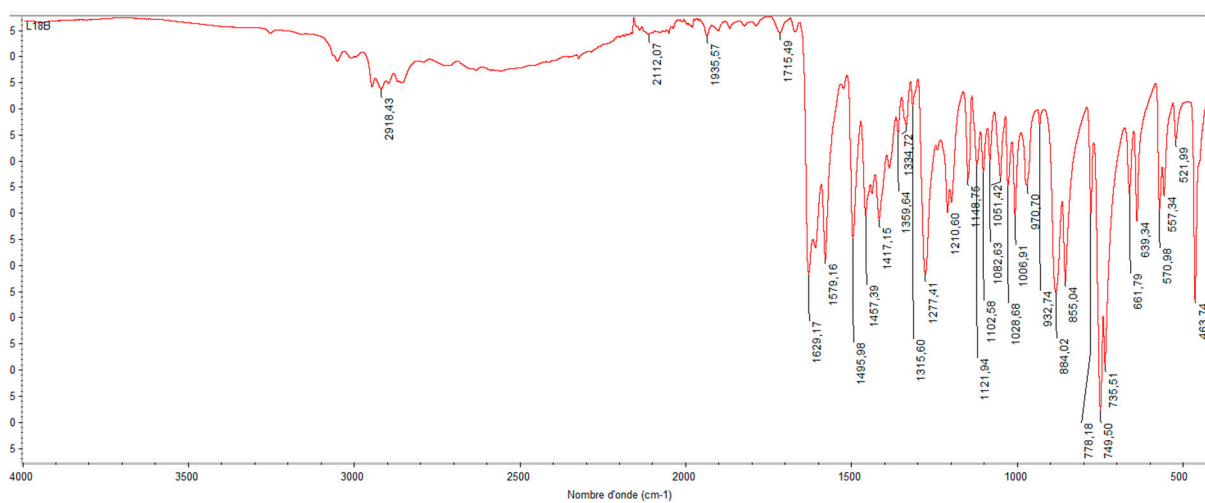

Figure S1. FT-IR spectrum of the ligand H<sub>2</sub>L.

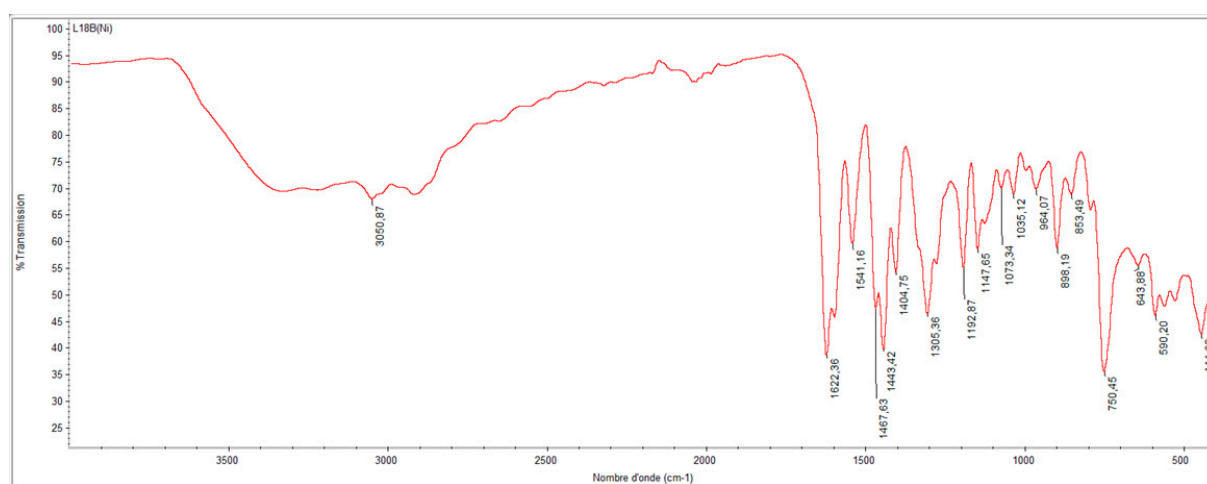

Figure S2. FT-IR spectrum of the [Ni<sub>2</sub>HL<sub>2</sub>(EtOH)<sub>2</sub>](Cl)(EtOH) complex.

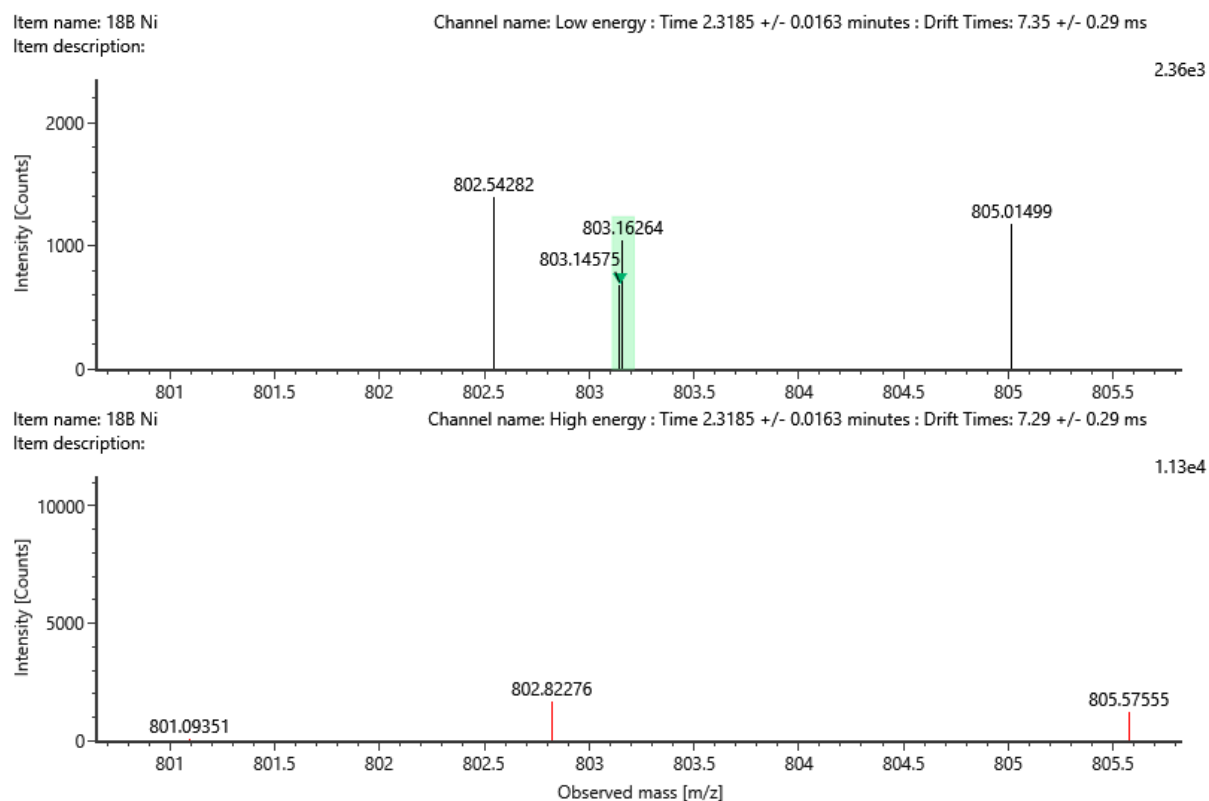

**Figure S3.** Mass spectrum of the  $[\text{Ni}_2\text{HL}_2(\text{EtOH})_2](\text{Cl})(\text{EtOH})$  complex.

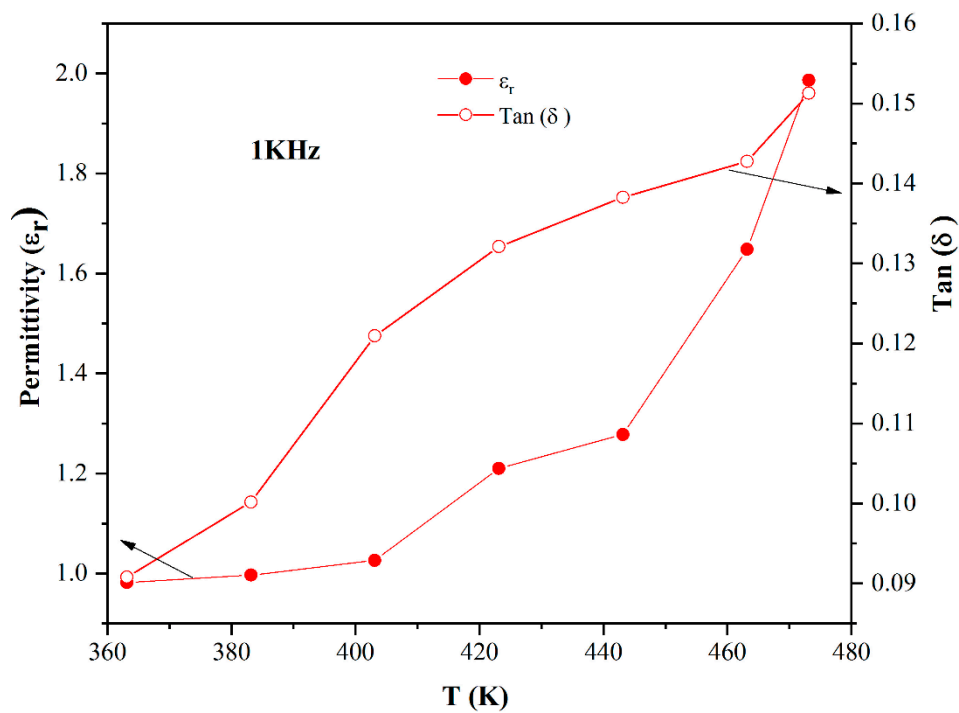

**Figure S4.** Temperature dependence of the permittivity ( $\epsilon_r$ ) and the dielectric loss tan ( $\delta$ ) of  $\text{H}_2\text{L}$  and  $[\text{Ni}_2\text{HL}_2(\text{EtOH})_2](\text{Cl})(\text{EtOH})$  at 1KHz.

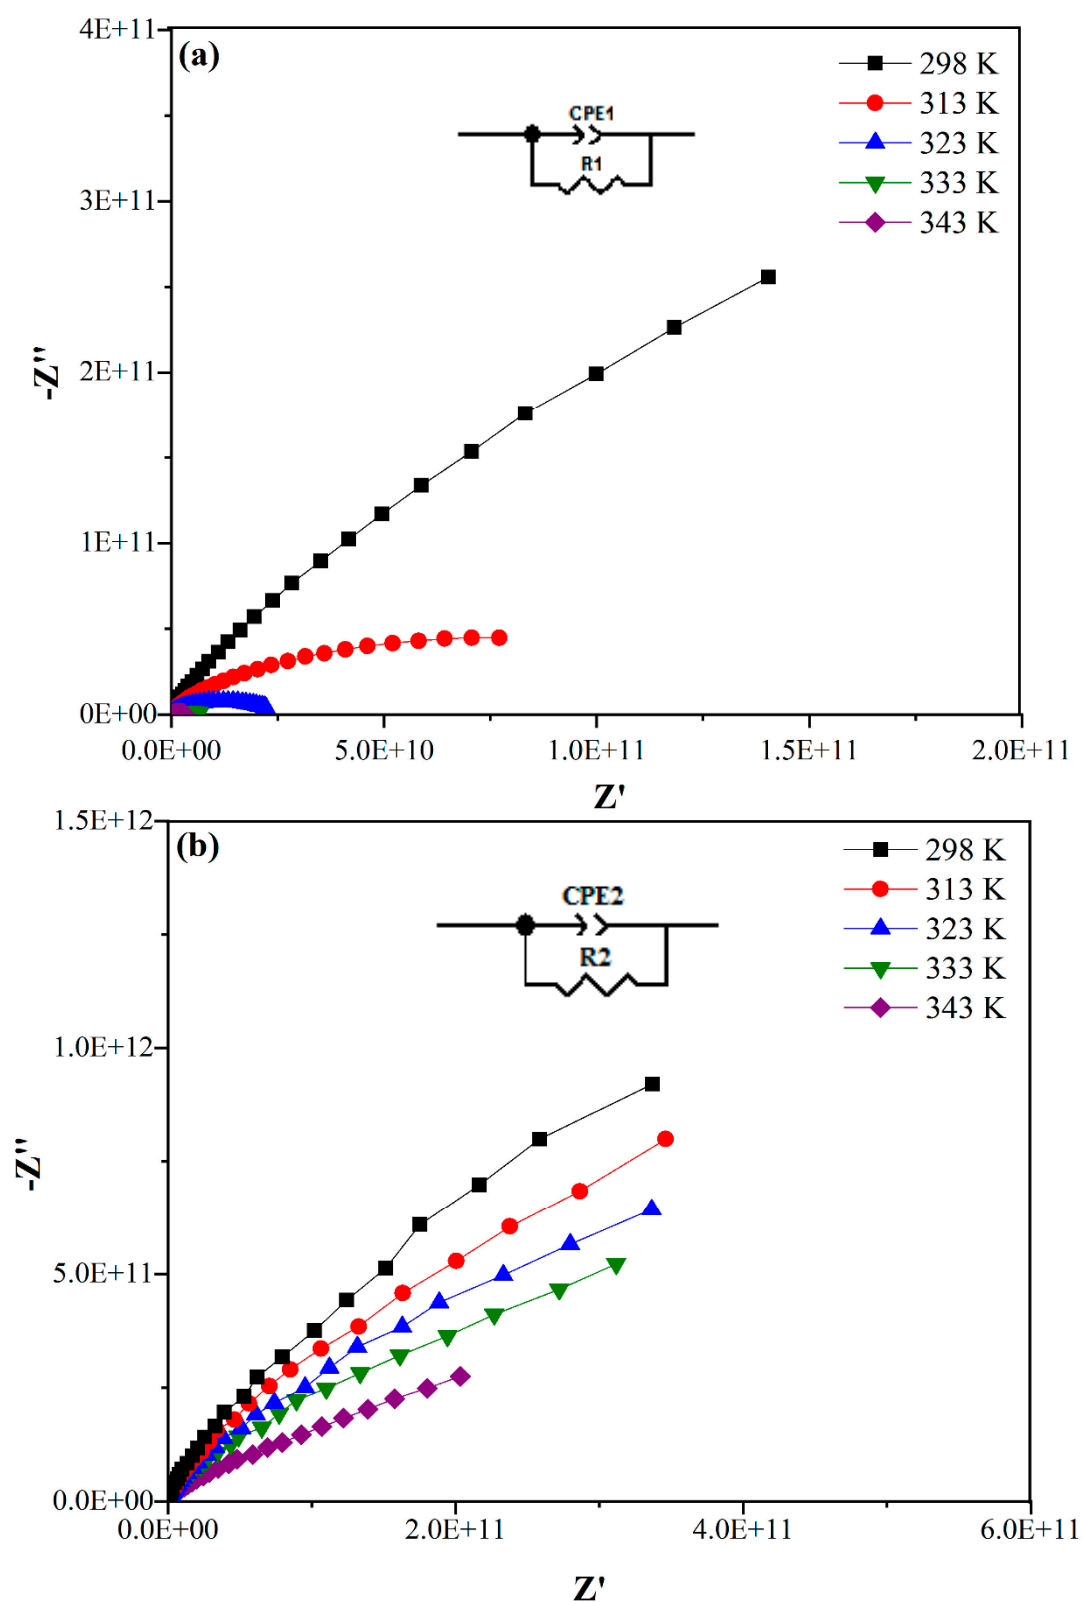

**Figure S5.** Cole-Cole diagrams of (a)  $H_2L$  and (b)  $[Ni_2HL_2(EtOH)_2](Cl)(EtOH)$  at different temperatures.

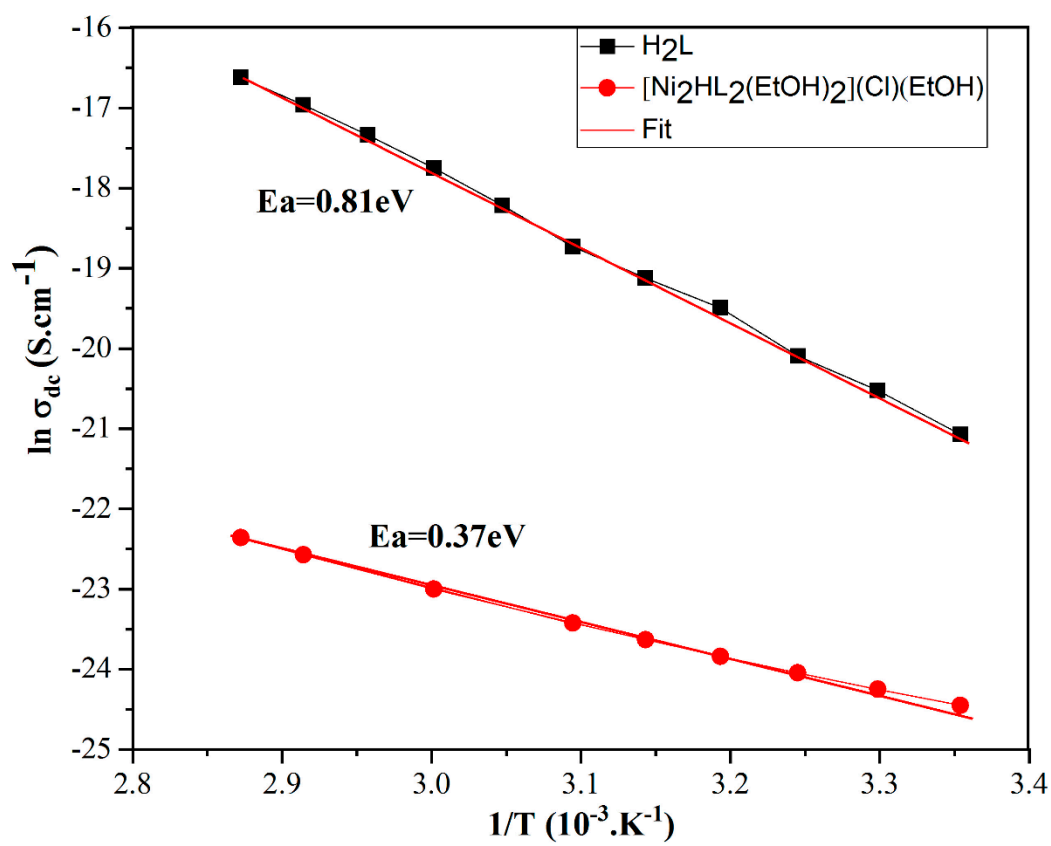

Figure S6.  $\ln(\sigma_{dc})$  versus  $10^3/T$  plots of H<sub>2</sub>L and [Ni<sub>2</sub>HL<sub>2</sub>(EtOH)<sub>2</sub>](Cl)(EtOH).

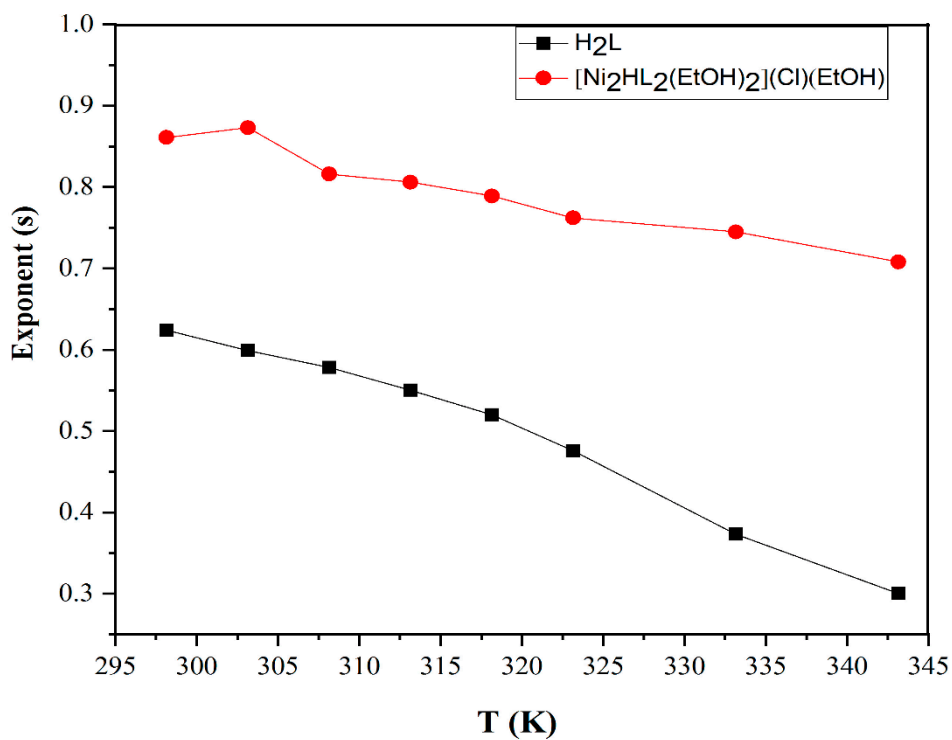

Figure S7. Temperature dependence of the exponent (s) of H<sub>2</sub>L and [Ni<sub>2</sub>HL<sub>2</sub>(EtOH)<sub>2</sub>](Cl)(EtOH).

**Table S1.** Fractional atomic coordinates and isotropic or equivalent isotropic displacement parameters ( $\text{\AA}^2$ ) of  $[\text{Ni}_2\text{HL}_2(\text{EtOH})_2](\text{Cl})(\text{EtOH})$  complex.

|      | <i>x</i>     | <i>y</i>   | <i>z</i>     | $U_{\text{iso}}^*/U_{\text{eq}}$ | Occ. (<1) |
|------|--------------|------------|--------------|----------------------------------|-----------|
| C1   | 0.60513 (18) | 0.4545 (3) | 0.36161 (15) | 0.0417 (7)                       |           |
| C2   | 0.6743 (2)   | 0.4428 (3) | 0.32764 (17) | 0.0535 (8)                       |           |
| H2   | 0.714795     | 0.490120   | 0.338096     | 0.064*                           |           |
| C3   | 0.6832 (2)   | 0.3629 (3) | 0.27935 (19) | 0.0615 (10)                      |           |
| H3   | 0.729416     | 0.357180   | 0.257206     | 0.074*                           |           |
| C4   | 0.6247 (3)   | 0.2909 (3) | 0.2631 (2)   | 0.0680 (11)                      |           |
| H4   | 0.631156     | 0.236610   | 0.230348     | 0.082*                           |           |
| C5   | 0.5572 (3)   | 0.3003 (3) | 0.29581 (19) | 0.0610 (9)                       |           |
| H5   | 0.517556     | 0.251797   | 0.284719     | 0.073*                           |           |
| C6   | 0.5455 (2)   | 0.3812 (3) | 0.34589 (16) | 0.0456 (7)                       |           |
| C7   | 0.46993 (19) | 0.3876 (3) | 0.37431 (16) | 0.0483 (8)                       |           |
| H7   | 0.433707     | 0.340075   | 0.355649     | 0.058*                           |           |
| C8   | 0.36433 (19) | 0.4454 (3) | 0.43552 (19) | 0.0546 (9)                       |           |
| H8A  | 0.341576     | 0.386830   | 0.408478     | 0.065*                           |           |
| H8B  | 0.341540     | 0.516678   | 0.422792     | 0.065*                           |           |
| C9   | 0.34597 (19) | 0.4226 (3) | 0.5068 (2)   | 0.0564 (8)                       |           |
| H9A  | 0.374293     | 0.356746   | 0.521150     | 0.068*                           |           |
| H9B  | 0.292259     | 0.404918   | 0.510468     | 0.068*                           |           |
| C10  | 0.3641 (2)   | 0.5203 (3) | 0.55298 (19) | 0.0556 (9)                       |           |
| H10A | 0.343833     | 0.589540   | 0.534508     | 0.067*                           |           |
| H10B | 0.339754     | 0.507610   | 0.595404     | 0.067*                           |           |
| C11  | 0.60919 (18) | 0.5815 (2) | 0.60327 (15) | 0.0383 (6)                       |           |
| C12  | 0.68214 (18) | 0.5899 (3) | 0.63198 (15) | 0.0444 (7)                       |           |
| H12  | 0.722167     | 0.617260   | 0.606534     | 0.053*                           |           |
| C13  | 0.6957 (2)   | 0.5590 (3) | 0.69591 (17) | 0.0560 (9)                       |           |
| H13  | 0.744722     | 0.564775   | 0.712887     | 0.067*                           |           |
| C14  | 0.6380 (2)   | 0.5195 (4) | 0.73571 (17) | 0.0627 (10)                      |           |
| H14  | 0.647719     | 0.497746   | 0.779110     | 0.075*                           |           |
| C15  | 0.5663 (2)   | 0.5130 (3) | 0.71023 (16) | 0.0575 (9)                       |           |
| H15  | 0.526929     | 0.488377   | 0.737303     | 0.069*                           |           |
| C16  | 0.55007 (19) | 0.5425 (3) | 0.64413 (15) | 0.0442 (7)                       |           |
| C17  | 0.47155 (19) | 0.5319 (3) | 0.62220 (17) | 0.0472 (7)                       |           |
| H17  | 0.435110     | 0.523753   | 0.655220     | 0.057*                           |           |
| C18  | 0.6430 (2)   | 0.3466 (3) | 0.5192 (2)   | 0.0621 (10)                      |           |
| H18A | 0.673035     | 0.414697   | 0.514087     | 0.074*                           |           |
| H18B | 0.655498     | 0.296347   | 0.482895     | 0.074*                           |           |

|      |              |            |              |             |  |
|------|--------------|------------|--------------|-------------|--|
| C19  | 0.6631 (3)   | 0.2912 (4) | 0.5830 (2)   | 0.0752 (12) |  |
| H19A | 0.649621     | 0.340002   | 0.619064     | 0.113*      |  |
| H19B | 0.716759     | 0.276543   | 0.584123     | 0.113*      |  |
| H19C | 0.635766     | 0.221422   | 0.586928     | 0.113*      |  |
| C20  | 0.4336 (2)   | 0.7526 (3) | 0.45966 (19) | 0.0515 (9)  |  |
| C21  | 0.3843 (2)   | 0.7408 (4) | 0.4054 (3)   | 0.0696 (11) |  |
| H21  | 0.400197     | 0.700931   | 0.368258     | 0.083*      |  |
| C22  | 0.3121 (3)   | 0.7883 (4) | 0.4068 (3)   | 0.0861 (16) |  |
| H22  | 0.280194     | 0.779778   | 0.370351     | 0.103*      |  |
| C23  | 0.2871 (3)   | 0.8468 (4) | 0.4604 (3)   | 0.0880 (17) |  |
| H23  | 0.238416     | 0.877389   | 0.460715     | 0.106*      |  |
| C24  | 0.3335 (2)   | 0.8605 (3) | 0.5132 (3)   | 0.0752 (12) |  |
| H24  | 0.315796     | 0.900040   | 0.549835     | 0.090*      |  |
| C25  | 0.4078 (2)   | 0.8165 (3) | 0.5142 (2)   | 0.0579 (9)  |  |
| C26  | 0.4535 (2)   | 0.8427 (3) | 0.5718 (2)   | 0.0580 (9)  |  |
| H26  | 0.427665     | 0.872828   | 0.607865     | 0.070*      |  |
| C27  | 0.5579 (2)   | 0.8651 (3) | 0.64167 (18) | 0.0615 (10) |  |
| H27A | 0.573018     | 0.799140   | 0.666841     | 0.074*      |  |
| H27B | 0.519935     | 0.905523   | 0.667152     | 0.074*      |  |
| C28  | 0.6264 (3)   | 0.9403 (3) | 0.63134 (19) | 0.0656 (11) |  |
| H28A | 0.613616     | 0.997463   | 0.598833     | 0.079*      |  |
| H28B | 0.637698     | 0.978680   | 0.672605     | 0.079*      |  |
| C29  | 0.6968 (2)   | 0.8792 (3) | 0.60859 (16) | 0.0560 (9)  |  |
| H29A | 0.740299     | 0.928902   | 0.613522     | 0.067*      |  |
| H29B | 0.705015     | 0.814285   | 0.636912     | 0.067*      |  |
| C30  | 0.71351 (18) | 0.7638 (2) | 0.39692 (15) | 0.0404 (7)  |  |
| C31  | 0.7288 (2)   | 0.7473 (3) | 0.33015 (16) | 0.0496 (8)  |  |
| H31  | 0.697016     | 0.701516   | 0.305013     | 0.059*      |  |
| C32  | 0.7909 (2)   | 0.7981 (3) | 0.30084 (19) | 0.0621 (10) |  |
| H32  | 0.800561     | 0.786141   | 0.256139     | 0.074*      |  |
| C33  | 0.8380 (2)   | 0.8656 (3) | 0.3365 (2)   | 0.0638 (10) |  |
| H33  | 0.879199     | 0.900546   | 0.316199     | 0.077*      |  |
| C34  | 0.8246 (2)   | 0.8817 (3) | 0.40251 (19) | 0.0543 (9)  |  |
| H34  | 0.858127     | 0.926054   | 0.426851     | 0.065*      |  |
| C35  | 0.76220 (18) | 0.8338 (3) | 0.43431 (16) | 0.0425 (7)  |  |
| C36  | 0.75131 (18) | 0.8591 (2) | 0.50387 (17) | 0.0451 (7)  |  |
| H36  | 0.792305     | 0.892646   | 0.525262     | 0.054*      |  |
| C37  | 0.5526 (3)   | 0.9365 (4) | 0.3838 (2)   | 0.0815 (13) |  |
| H37A | 0.499582     | 0.958399   | 0.380638     | 0.098*      |  |
| H37B | 0.558339     | 0.863328   | 0.362893     | 0.098*      |  |



|      |              |              |              |              |        |
|------|--------------|--------------|--------------|--------------|--------|
| C38  | 0.6001 (5)   | 1.0197 (6)   | 0.3492 (3)   | 0.132 (3)    |        |
| H38A | 0.600315     | 1.089094     | 0.373716     | 0.197*       |        |
| H38B | 0.579811     | 1.032850     | 0.305806     | 0.197*       |        |
| H38C | 0.651097     | 0.991524     | 0.345615     | 0.197*       |        |
| C39  | 0.3975 (7)   | 0.1939 (8)   | 0.6742 (6)   | 0.239 (7)    |        |
| H39A | 0.363314     | 0.182911     | 0.711345     | 0.287*       |        |
| H39B | 0.376356     | 0.252505     | 0.646221     | 0.287*       |        |
| C40A | 0.4719 (10)  | 0.229 (2)    | 0.6986 (13)  | 0.30 (2)     | 0.6011 |
| H40A | 0.465361     | 0.279439     | 0.735549     | 0.444*       | 0.6011 |
| H40B | 0.498840     | 0.267927     | 0.663960     | 0.444*       | 0.6011 |
| H40C | 0.500422     | 0.164512     | 0.712284     | 0.444*       | 0.6011 |
| C40B | 0.4684 (12)  | 0.191 (4)    | 0.7118 (17)  | 0.27 (3)     | 0.3989 |
| H40D | 0.502331     | 0.248120     | 0.695113     | 0.409*       | 0.3989 |
| H40E | 0.491675     | 0.118497     | 0.707297     | 0.409*       | 0.3989 |
| H40F | 0.457901     | 0.205779     | 0.757625     | 0.409*       | 0.3989 |
| N1   | 0.44666 (15) | 0.4499 (2)   | 0.42155 (13) | 0.0436 (6)   |        |
| N2   | 0.44717 (15) | 0.5326 (2)   | 0.56289 (14) | 0.0438 (6)   |        |
| N3   | 0.52479 (17) | 0.8293 (2)   | 0.57883 (14) | 0.0496 (7)   |        |
| N4   | 0.69263 (17) | 0.8411 (2)   | 0.53942 (12) | 0.0446 (6)   |        |
| O1   | 0.59666 (13) | 0.5334 (2)   | 0.40779 (12) | 0.0493 (6)   |        |
| O2   | 0.59963 (11) | 0.60982 (18) | 0.54106 (10) | 0.0380 (4)   |        |
| O3   | 0.56373 (13) | 0.3748 (2)   | 0.51604 (13) | 0.0502 (6)   |        |
| O4   | 0.50098 (12) | 0.70281 (19) | 0.45858 (11) | 0.0454 (5)   |        |
| O5   | 0.65403 (13) | 0.7147 (2)   | 0.42592 (11) | 0.0503 (6)   |        |
| H50  | 0.646939     | 0.652424     | 0.409362     | 0.076*       |        |
| O6   | 0.57418 (17) | 0.9286 (2)   | 0.45239 (13) | 0.0609 (7)   |        |
| O7   | 0.4035 (4)   | 0.0906 (6)   | 0.6371 (4)   | 0.201 (3)    |        |
| H7A  | 0.432482     | 0.099890     | 0.605801     | 0.301*       |        |
| Ni1  | 0.51975 (2)  | 0.53345 (3)  | 0.48375 (2)  | 0.03755 (10) |        |
| Ni2  | 0.59223 (2)  | 0.77388 (3)  | 0.50365 (2)  | 0.03901 (10) |        |
| Cl1  | 0.49158 (7)  | 0.13811 (9)  | 0.50978 (8)  | 0.0903 (4)   |        |
| H3O  | 0.534 (2)    | 0.315 (4)    | 0.513 (2)    | 0.072 (13)*  |        |
| H6O  | 0.553 (3)    | 0.985 (4)    | 0.475 (3)    | 0.091 (16)*  |        |

**Table S2.** Atomic displacement parameters ( $\text{\AA}^2$ ) for  $[\text{Ni}_2\text{HL}_2(\text{EtOH})_2](\text{Cl})(\text{EtOH})$  complex.

|    | $U^{11}$    | $U^{22}$    | $U^{33}$    | $U^{12}$     | $U^{13}$     | $U^{23}$     |
|----|-------------|-------------|-------------|--------------|--------------|--------------|
| C1 | 0.0535 (17) | 0.0358 (16) | 0.0354 (14) | -0.0009 (13) | -0.0012 (13) | 0.0027 (12)  |
| C2 | 0.060 (2)   | 0.052 (2)   | 0.0475 (18) | -0.0102 (16) | 0.0071 (15)  | -0.0028 (15) |
| C3 | 0.070 (2)   | 0.054 (2)   | 0.059 (2)   | 0.0048 (18)  | 0.0194 (18)  | -0.0044 (17) |
| C4 | 0.095 (3)   | 0.048 (2)   | 0.061 (2)   | 0.001 (2)    | 0.008 (2)    | -0.0175 (17) |

|      |             |             |             |              |              |              |
|------|-------------|-------------|-------------|--------------|--------------|--------------|
| C5   | 0.076 (2)   | 0.045 (2)   | 0.060 (2)   | -0.0056 (17) | -0.0066 (19) | -0.0099 (16) |
| C6   | 0.0565 (18) | 0.0386 (16) | 0.0394 (15) | -0.0010 (14) | -0.0029 (14) | -0.0024 (13) |
| C7   | 0.0542 (18) | 0.0448 (18) | 0.0464 (17) | -0.0124 (15) | -0.0096 (15) | -0.0027 (14) |
| C8   | 0.0420 (17) | 0.058 (2)   | 0.063 (2)   | -0.0117 (16) | -0.0046 (15) | -0.0012 (17) |
| C9   | 0.0441 (16) | 0.0564 (19) | 0.069 (2)   | -0.0139 (15) | 0.0054 (17)  | -0.0025 (19) |
| C10  | 0.0420 (17) | 0.059 (2)   | 0.066 (2)   | -0.0080 (16) | 0.0081 (16)  | -0.0069 (18) |
| C11  | 0.0507 (17) | 0.0274 (14) | 0.0361 (15) | 0.0039 (12)  | 0.0006 (12)  | -0.0015 (11) |
| C12  | 0.0473 (16) | 0.0441 (17) | 0.0411 (16) | 0.0028 (14)  | -0.0017 (13) | -0.0022 (13) |
| C13  | 0.060 (2)   | 0.062 (2)   | 0.0461 (18) | 0.0069 (17)  | -0.0118 (16) | -0.0017 (17) |
| C14  | 0.083 (3)   | 0.072 (3)   | 0.0334 (15) | 0.005 (2)    | -0.0044 (16) | 0.0027 (16)  |
| C15  | 0.071 (2)   | 0.064 (2)   | 0.0357 (16) | 0.0010 (18)  | 0.0088 (16)  | -0.0018 (15) |
| C16  | 0.0537 (17) | 0.0425 (17) | 0.0348 (15) | -0.0005 (14) | 0.0057 (13)  | -0.0017 (13) |
| C17  | 0.0501 (17) | 0.0453 (18) | 0.0456 (17) | -0.0024 (14) | 0.0162 (14)  | -0.0037 (14) |
| C18  | 0.0531 (19) | 0.060 (2)   | 0.073 (2)   | 0.0117 (16)  | 0.0054 (17)  | 0.0002 (18)  |
| C19  | 0.071 (3)   | 0.068 (3)   | 0.086 (3)   | 0.012 (2)    | -0.017 (2)   | 0.004 (2)    |
| C20  | 0.0475 (18) | 0.0370 (17) | 0.068 (2)   | -0.0050 (14) | -0.0059 (16) | 0.0170 (15)  |
| C21  | 0.062 (2)   | 0.060 (2)   | 0.087 (3)   | -0.0082 (19) | -0.025 (2)   | 0.015 (2)    |
| C22  | 0.062 (3)   | 0.063 (3)   | 0.131 (5)   | -0.011 (2)   | -0.038 (3)   | 0.027 (3)    |
| C23  | 0.056 (2)   | 0.055 (3)   | 0.155 (5)   | 0.001 (2)    | -0.013 (3)   | 0.022 (3)    |
| C24  | 0.056 (2)   | 0.047 (2)   | 0.122 (4)   | 0.0061 (17)  | 0.007 (2)    | 0.013 (2)    |
| C25  | 0.0541 (18) | 0.0355 (15) | 0.084 (3)   | 0.0030 (15)  | 0.0102 (19)  | 0.0112 (18)  |
| C26  | 0.072 (2)   | 0.0368 (18) | 0.066 (2)   | 0.0071 (17)  | 0.0148 (19)  | 0.0045 (16)  |
| C27  | 0.084 (3)   | 0.056 (2)   | 0.0452 (19) | 0.010 (2)    | 0.0100 (18)  | -0.0055 (16) |
| C28  | 0.107 (3)   | 0.046 (2)   | 0.0455 (19) | -0.005 (2)   | -0.002 (2)   | -0.0120 (16) |
| C29  | 0.074 (2)   | 0.052 (2)   | 0.0407 (17) | -0.0123 (18) | -0.0070 (16) | -0.0054 (15) |
| C30  | 0.0476 (16) | 0.0327 (15) | 0.0402 (15) | -0.0023 (13) | 0.0002 (13)  | 0.0050 (12)  |
| C31  | 0.059 (2)   | 0.0493 (19) | 0.0387 (16) | -0.0039 (15) | 0.0009 (14)  | 0.0007 (13)  |
| C32  | 0.082 (3)   | 0.059 (2)   | 0.0459 (18) | -0.007 (2)   | 0.0193 (18)  | 0.0046 (16)  |
| C33  | 0.062 (2)   | 0.057 (2)   | 0.071 (2)   | -0.0123 (19) | 0.0225 (19)  | 0.0051 (19)  |
| C34  | 0.0496 (18) | 0.045 (2)   | 0.067 (2)   | -0.0087 (15) | 0.0057 (16)  | -0.0039 (16) |
| C35  | 0.0492 (17) | 0.0332 (15) | 0.0445 (16) | -0.0007 (13) | -0.0029 (13) | 0.0020 (13)  |
| C36  | 0.0537 (16) | 0.0351 (14) | 0.0454 (15) | -0.0084 (12) | -0.0066 (16) | 0.0017 (14)  |
| C37  | 0.108 (3)   | 0.072 (3)   | 0.064 (3)   | 0.005 (3)    | -0.016 (3)   | 0.020 (2)    |
| C38  | 0.198 (7)   | 0.096 (4)   | 0.098 (4)   | -0.009 (4)   | 0.003 (4)    | 0.045 (4)    |
| C39A | 0.178 (9)   | 0.185 (9)   | 0.211 (9)   | -0.035 (8)   | 0.076 (8)    | -0.074 (8)   |
| C40A | 0.215 (13)  | 0.198 (11)  | 0.232 (13)  | -0.109 (10)  | 0.048 (11)   | -0.044 (10)  |
| C39B | 0.197 (11)  | 0.173 (11)  | 0.217 (11)  | -0.044 (10)  | 0.068 (11)   | -0.062 (10)  |
| C40B | 0.198 (18)  | 0.131 (16)  | 0.224 (17)  | -0.076 (16)  | 0.061 (17)   | -0.045 (16)  |
| N1   | 0.0437 (14) | 0.0432 (15) | 0.0432 (14) | -0.0063 (12) | -0.0027 (11) | 0.0023 (11)  |
| N2   | 0.0396 (14) | 0.0415 (15) | 0.0500 (15) | -0.0030 (11) | 0.0055 (11)  | -0.0045 (12) |

|     |              |              |              |               |               |               |
|-----|--------------|--------------|--------------|---------------|---------------|---------------|
| N3  | 0.0623 (18)  | 0.0397 (15)  | 0.0466 (15)  | 0.0041 (13)   | 0.0098 (13)   | 0.0030 (12)   |
| N4  | 0.0626 (17)  | 0.0342 (14)  | 0.0368 (13)  | -0.0054 (12)  | -0.0059 (12)  | 0.0000 (10)   |
| O1  | 0.0595 (13)  | 0.0457 (14)  | 0.0426 (12)  | -0.0139 (10)  | 0.0115 (10)   | -0.0136 (10)  |
| O2  | 0.0447 (11)  | 0.0360 (11)  | 0.0326 (10)  | -0.0028 (9)   | -0.0018 (8)   | 0.0034 (8)    |
| O3  | 0.0484 (12)  | 0.0365 (11)  | 0.0645 (15)  | 0.0028 (10)   | 0.0000 (11)   | 0.0017 (10)   |
| O4  | 0.0478 (12)  | 0.0382 (12)  | 0.0490 (12)  | -0.0002 (9)   | -0.0073 (9)   | 0.0040 (9)    |
| O5  | 0.0597 (13)  | 0.0473 (13)  | 0.0426 (11)  | -0.0200 (11)  | 0.0118 (10)   | -0.0093 (10)  |
| O6  | 0.0835 (18)  | 0.0464 (15)  | 0.0536 (15)  | 0.0020 (14)   | -0.0060 (13)  | 0.0128 (12)   |
| O7  | 0.193 (6)    | 0.169 (6)    | 0.230 (7)    | -0.020 (4)    | 0.064 (5)     | -0.056 (5)    |
| Ni1 | 0.03971 (17) | 0.03510 (18) | 0.03730 (17) | -0.00415 (15) | 0.00034 (15)  | -0.00075 (15) |
| Ni2 | 0.04793 (19) | 0.03328 (17) | 0.03531 (16) | -0.00276 (15) | -0.00071 (16) | 0.00100 (16)  |
| Cl1 | 0.1048 (8)   | 0.0455 (5)   | 0.1200 (10)  | -0.0024 (5)   | -0.0245 (8)   | -0.0082 (6)   |

**Table S3.** Selected bond distances (Å) and angles (°) for the  $[\text{Ni}_2\text{HL}_2(\text{EtOH})_2](\text{Cl})(\text{EtOH})$  complex.

|          |           |          |           |
|----------|-----------|----------|-----------|
| C1—O1    | 1.330 (4) | C27—N3   | 1.460 (5) |
| C1—C6    | 1.399 (5) | C27—C28  | 1.513 (6) |
| C1—C2    | 1.404 (5) | C27—H27A | 0.9700    |
| C2—C3    | 1.369 (5) | C27—H27B | 0.9700    |
| C2—H2    | 0.9300    | C28—C29  | 1.506 (6) |
| C3—C4    | 1.376 (6) | C28—H28A | 0.9700    |
| C3—H3    | 0.9300    | C28—H28B | 0.9700    |
| C4—C5    | 1.363 (6) | C29—N4   | 1.471 (4) |
| C4—H4    | 0.9300    | C29—H29A | 0.9700    |
| C5—C6    | 1.409 (5) | C29—H29B | 0.9700    |
| C5—H5    | 0.9300    | C30—O5   | 1.333 (4) |
| C6—C7    | 1.449 (5) | C30—C31  | 1.390 (4) |
| C7—N1    | 1.275 (4) | C30—C35  | 1.411 (4) |
| C7—H7    | 0.9300    | C31—C32  | 1.380 (5) |
| C8—N1    | 1.475 (4) | C31—H31  | 0.9300    |
| C8—C9    | 1.501 (6) | C32—C33  | 1.359 (6) |
| C8—H8A   | 0.9700    | C32—H32  | 0.9300    |
| C8—H8B   | 0.9700    | C33—C34  | 1.367 (5) |
| C9—C10   | 1.522 (5) | C33—H33  | 0.9300    |
| C9—H9A   | 0.9700    | C34—C35  | 1.393 (5) |
| C9—H9B   | 0.9700    | C34—H34  | 0.9300    |
| C10—N2   | 1.481 (4) | C35—C36  | 1.450 (5) |
| C10—H10A | 0.9700    | C36—N4   | 1.275 (4) |
| C10—H10B | 0.9700    | C36—H36  | 0.9300    |

|          |           |             |             |
|----------|-----------|-------------|-------------|
| C11—O2   | 1.312 (3) | C37—O6      | 1.440 (5)   |
| C11—C16  | 1.406 (4) | C37—C38     | 1.469 (8)   |
| C11—C12  | 1.411 (4) | C37—H37A    | 0.9700      |
| C12—C13  | 1.364 (5) | C37—H37B    | 0.9700      |
| C12—H12  | 0.9300    | C38—H38A    | 0.9600      |
| C13—C14  | 1.377 (5) | C38—H38B    | 0.9600      |
| C13—H13  | 0.9300    | C38—H38C    | 0.9600      |
| C14—C15  | 1.363 (5) | C39—O7      | 1.4399 (15) |
| C14—H14  | 0.9300    | C39—C40A    | 1.4596 (15) |
| C15—C16  | 1.410 (5) | C39—C40B    | 1.4597 (15) |
| C15—H15  | 0.9300    | C39—H39A    | 0.9700      |
| C16—C17  | 1.455 (5) | C39—H39B    | 0.9700      |
| C17—N2   | 1.273 (4) | C40A—H40A   | 0.9600      |
| C17—H17  | 0.9300    | C40A—H40B   | 0.9600      |
| C18—O3   | 1.435 (4) | C40A—H40C   | 0.9600      |
| C18—C19  | 1.489 (6) | C40B—H40D   | 0.9600      |
| C18—H18A | 0.9700    | C40B—H40E   | 0.9600      |
| C18—H18B | 0.9700    | C40B—H40F   | 0.9600      |
| C19—H19A | 0.9600    | N1—Ni1      | 2.052 (3)   |
| C19—H19B | 0.9600    | N2—Ni1      | 2.046 (3)   |
| C19—H19C | 0.9600    | N3—Ni2      | 2.036 (3)   |
| C20—O4   | 1.323 (4) | N4—Ni2      | 2.067 (3)   |
| C20—C21  | 1.404 (6) | O1—Ni1      | 2.045 (2)   |
| C20—C25  | 1.412 (6) | O2—Ni1      | 2.033 (2)   |
| C21—C22  | 1.390 (6) | O2—Ni2      | 2.091 (2)   |
| C21—H21  | 0.9300    | O3—Ni1      | 2.135 (2)   |
| C22—C23  | 1.359 (8) | O3—H3O      | 0.88 (5)    |
| C22—H22  | 0.9300    | O4—Ni2      | 2.028 (2)   |
| C23—C24  | 1.353 (7) | O4—Ni1      | 2.097 (2)   |
| C23—H23  | 0.9300    | O5—Ni2      | 2.035 (2)   |
| C24—C25  | 1.406 (5) | O5—H5O      | 0.8200      |
| C24—H24  | 0.9300    | O6—Ni2      | 2.130 (3)   |
| C25—C26  | 1.448 (6) | O6—H6O      | 0.89 (5)    |
| C26—N3   | 1.272 (5) | O7—H7A      | 0.8200      |
| C26—H26  | 0.9300    |             |             |
|          |           |             |             |
| O1—C1—C6 | 120.9 (3) | O5—C30—C31  | 121.2 (3)   |
| O1—C1—C2 | 120.6 (3) | O5—C30—C35  | 119.8 (3)   |
| C6—C1—C2 | 118.5 (3) | C31—C30—C35 | 119.0 (3)   |
| C3—C2—C1 | 121.0 (3) | C32—C31—C30 | 120.5 (3)   |

|               |           |                |            |
|---------------|-----------|----------------|------------|
| C3—C2—H2      | 119.5     | C32—C31—H31    | 119.7      |
| C1—C2—H2      | 119.5     | C30—C31—H31    | 119.7      |
| C2—C3—C4      | 121.0 (4) | C33—C32—C31    | 120.8 (3)  |
| C2—C3—H3      | 119.5     | C33—C32—H32    | 119.6      |
| C4—C3—H3      | 119.5     | C31—C32—H32    | 119.6      |
| C5—C4—C3      | 119.0 (4) | C32—C33—C34    | 119.7 (3)  |
| C5—C4—H4      | 120.5     | C32—C33—H33    | 120.2      |
| C3—C4—H4      | 120.5     | C34—C33—H33    | 120.2      |
| C4—C5—C6      | 122.0 (4) | C33—C34—C35    | 121.9 (3)  |
| C4—C5—H5      | 119.0     | C33—C34—H34    | 119.1      |
| C6—C5—H5      | 119.0     | C35—C34—H34    | 119.1      |
| C1—C6—C5      | 118.5 (3) | C34—C35—C30    | 118.1 (3)  |
| C1—C6—C7      | 124.3 (3) | C34—C35—C36    | 117.8 (3)  |
| C5—C6—C7      | 117.0 (3) | C30—C35—C36    | 124.1 (3)  |
| N1—C7—C6      | 128.4 (3) | N4—C36—C35     | 128.2 (3)  |
| N1—C7—H7      | 115.8     | N4—C36—H36     | 115.9      |
| C6—C7—H7      | 115.8     | C35—C36—H36    | 115.9      |
| N1—C8—C9      | 113.6 (3) | O6—C37—C38     | 110.6 (5)  |
| N1—C8—H8A     | 108.8     | O6—C37—H37A    | 109.5      |
| C9—C8—H8A     | 108.8     | C38—C37—H37A   | 109.5      |
| N1—C8—H8B     | 108.8     | O6—C37—H37B    | 109.5      |
| C9—C8—H8B     | 108.8     | C38—C37—H37B   | 109.5      |
| H8A—C8—H8B    | 107.7     | H37A—C37—H37B  | 108.1      |
| C8—C9—C10     | 114.0 (3) | C37—C38—H38A   | 109.5      |
| C8—C9—H9A     | 108.8     | C37—C38—H38B   | 109.5      |
| C10—C9—H9A    | 108.8     | H38A—C38—H38B  | 109.5      |
| C8—C9—H9B     | 108.8     | C37—C38—H38C   | 109.5      |
| C10—C9—H9B    | 108.8     | H38A—C38—H38C  | 109.5      |
| H9A—C9—H9B    | 107.7     | H38B—C38—H38C  | 109.5      |
| N2—C10—C9     | 111.4 (3) | O7—C39—C40A    | 110.8 (13) |
| N2—C10—H10A   | 109.4     | O7—C39—C40B    | 101 (2)    |
| C9—C10—H10A   | 109.4     | O7—C39—H39A    | 109.5      |
| N2—C10—H10B   | 109.4     | C40A—C39—H39A  | 109.5      |
| C9—C10—H10B   | 109.4     | O7—C39—H39B    | 109.5      |
| H10A—C10—H10B | 108.0     | C40A—C39—H39B  | 109.5      |
| O2—C11—C16    | 123.5 (3) | H39A—C39—H39B  | 108.1      |
| O2—C11—C12    | 119.5 (3) | C39—C40A—H40A  | 109.5      |
| C16—C11—C12   | 117.0 (3) | C39—C40A—H40B  | 109.5      |
| C13—C12—C11   | 122.0 (3) | H40A—C40A—H40B | 109.5      |
| C13—C12—H12   | 119.0     | C39—C40A—H40C  | 109.5      |

|               |           |                |             |
|---------------|-----------|----------------|-------------|
| C11—C12—H12   | 119.0     | H40A—C40A—H40C | 109.5       |
| C12—C13—C14   | 121.1 (3) | H40B—C40A—H40C | 109.5       |
| C12—C13—H13   | 119.5     | C39—C40B—H40D  | 109.5       |
| C14—C13—H13   | 119.5     | C39—C40B—H40E  | 109.5       |
| C15—C14—C13   | 118.6 (3) | H40D—C40B—H40E | 109.5       |
| C15—C14—H14   | 120.7     | C39—C40B—H40F  | 109.5       |
| C13—C14—H14   | 120.7     | H40D—C40B—H40F | 109.5       |
| C14—C15—C16   | 122.1 (3) | H40E—C40B—H40F | 109.5       |
| C14—C15—H15   | 119.0     | C7—N1—C8       | 115.9 (3)   |
| C16—C15—H15   | 119.0     | C7—N1—Ni1      | 122.5 (2)   |
| C11—C16—C15   | 119.2 (3) | C8—N1—Ni1      | 121.0 (2)   |
| C11—C16—C17   | 123.4 (3) | C17—N2—C10     | 117.3 (3)   |
| C15—C16—C17   | 117.4 (3) | C17—N2—Ni1     | 121.7 (2)   |
| N2—C17—C16    | 127.3 (3) | C10—N2—Ni1     | 120.6 (2)   |
| N2—C17—H17    | 116.4     | C26—N3—C27     | 117.0 (3)   |
| C16—C17—H17   | 116.4     | C26—N3—Ni2     | 122.1 (3)   |
| O3—C18—C19    | 111.8 (3) | C27—N3—Ni2     | 120.7 (2)   |
| O3—C18—H18A   | 109.3     | C36—N4—C29     | 116.3 (3)   |
| C19—C18—H18A  | 109.3     | C36—N4—Ni2     | 123.9 (2)   |
| O3—C18—H18B   | 109.3     | C29—N4—Ni2     | 119.6 (2)   |
| C19—C18—H18B  | 109.3     | C1—O1—Ni1      | 126.9 (2)   |
| H18A—C18—H18B | 107.9     | C11—O2—Ni1     | 121.35 (19) |
| C18—C19—H19A  | 109.5     | C11—O2—Ni2     | 126.33 (19) |
| C18—C19—H19B  | 109.5     | Ni1—O2—Ni2     | 99.52 (8)   |
| H19A—C19—H19B | 109.5     | C18—O3—Ni1     | 124.8 (2)   |
| C18—C19—H19C  | 109.5     | C18—O3—H3O     | 113 (3)     |
| H19A—C19—H19C | 109.5     | Ni1—O3—H3O     | 118 (3)     |
| H19B—C19—H19C | 109.5     | C20—O4—Ni2     | 121.0 (2)   |
| O4—C20—C21    | 119.7 (4) | C20—O4—Ni1     | 124.3 (2)   |
| O4—C20—C25    | 122.7 (3) | Ni2—O4—Ni1     | 99.47 (9)   |
| C21—C20—C25   | 117.7 (4) | C30—O5—Ni2     | 127.42 (19) |
| C22—C21—C20   | 120.6 (5) | C30—O5—H5O     | 109.5       |
| C22—C21—H21   | 119.7     | Ni2—O5—H5O     | 123.0       |
| C20—C21—H21   | 119.7     | C37—O6—Ni2     | 124.3 (3)   |
| C23—C22—C21   | 121.1 (5) | C37—O6—H6O     | 109 (3)     |
| C23—C22—H22   | 119.4     | Ni2—O6—H6O     | 117 (4)     |
| C21—C22—H22   | 119.4     | C39—O7—H7A     | 109.5       |
| C24—C23—C22   | 119.7 (4) | O2—Ni1—O1      | 88.33 (9)   |
| C24—C23—H23   | 120.1     | O2—Ni1—N2      | 89.30 (9)   |
| C22—C23—H23   | 120.1     | O1—Ni1—N2      | 177.19 (11) |

|               |           |           |             |
|---------------|-----------|-----------|-------------|
| C23—C24—C25   | 121.8 (5) | O2—Ni1—N1 | 175.08 (10) |
| C23—C24—H24   | 119.1     | O1—Ni1—N1 | 87.39 (10)  |
| C25—C24—H24   | 119.1     | N2—Ni1—N1 | 94.92 (11)  |
| C24—C25—C20   | 119.1 (4) | O2—Ni1—O4 | 79.65 (8)   |
| C24—C25—C26   | 116.6 (4) | O1—Ni1—O4 | 85.53 (10)  |
| C20—C25—C26   | 124.3 (3) | N2—Ni1—O4 | 95.52 (10)  |
| N3—C26—C25    | 127.6 (4) | N1—Ni1—O4 | 102.42 (10) |
| N3—C26—H26    | 116.2     | O2—Ni1—O3 | 88.17 (9)   |
| C25—C26—H26   | 116.2     | O1—Ni1—O3 | 89.42 (10)  |
| N3—C27—C28    | 111.7 (3) | N2—Ni1—O3 | 89.00 (10)  |
| N3—C27—H27A   | 109.3     | N1—Ni1—O3 | 89.36 (10)  |
| C28—C27—H27A  | 109.3     | O4—Ni1—O3 | 166.93 (9)  |
| N3—C27—H27B   | 109.3     | O4—Ni2—O5 | 86.12 (9)   |
| C28—C27—H27B  | 109.3     | O4—Ni2—N3 | 90.49 (11)  |
| H27A—C27—H27B | 107.9     | O5—Ni2—N3 | 176.61 (11) |
| C29—C28—C27   | 114.4 (3) | O4—Ni2—N4 | 173.03 (10) |
| C29—C28—H28A  | 108.7     | O5—Ni2—N4 | 86.95 (10)  |
| C27—C28—H28A  | 108.7     | N3—Ni2—N4 | 96.43 (11)  |
| C29—C28—H28B  | 108.7     | O4—Ni2—O2 | 79.92 (8)   |
| C27—C28—H28B  | 108.7     | O5—Ni2—O2 | 85.69 (9)   |
| H28A—C28—H28B | 107.6     | N3—Ni2—O2 | 93.83 (9)   |
| N4—C29—C28    | 113.4 (3) | N4—Ni2—O2 | 100.31 (9)  |
| N4—C29—H29A   | 108.9     | O4—Ni2—O6 | 91.24 (10)  |
| C28—C29—H29A  | 108.9     | O5—Ni2—O6 | 90.07 (11)  |
| N4—C29—H29B   | 108.9     | N3—Ni2—O6 | 89.90 (12)  |
| C28—C29—H29B  | 108.9     | N4—Ni2—O6 | 88.01 (11)  |
| H29A—C29—H29B | 107.7     | O2—Ni2—O6 | 170.43 (10) |
